# Supplementary material
Source: publisher figshare collection journal article supplement (https://tandf.figshare.com/articles/dataset/_/21829184)
Supplement: Supplementary file 1 [file 1]

Eva Verlinden, Brent C. Opmeer, Els P. M. van Meijel, Renée Beer, Carlijn de Roos, Iva A. E. Bicanic, Francien Lamers-Winkelmann, Miranda Olf, Frits Boer, Ramón J. L. Lindauer

Badania przesiewowe w kierunku zaburzenia po stresie traumatycznym i zaburzeń współwystępujących wśród dzieci i adolescentów.

Wprowadzenie: Zaburzenie po stresie traumatycznym (PTSD) jest upośledzającym zaburzeniem psychicznym, często współwystępującym z innymi zaburzeniami psychicznymi, jak zaburzenia nastroju oraz zaburzenia lękowe. Wczesna diagnoza PTSD oraz ewentualnych zaburzeń współwystępujących jest nieodzownym elementem w prewencji rozwoju PTSD. Dziecięca Zrewidowana Skala Wpływu Wydarzeń (the Children's Revised Impact of Event Scale; CRIES-13) jest rzetelnym i trafnym narzędziem samoopisowym do diagnozy PTSD u dzieci. Jednakże narzędzie to nie jest użyteczne w badaniach przesiewowych w kierunku zaburzeń współwystępujących u dzieci z diagnozą PTSD.

Cel: Celem badania było określenie właściwości psychometrycznych kwestionariusza CRIES-Plus, tj. kwestionariusza CRIES-13 z 12 dodatkowymi pozycjami mierzącymi zaburzenia współwystępujące z PTSD.

Metoda: W badaniu przy użyciu kwestionariusza CRIES-Plus uczestniczyło 398 duńskich dzieci w wieku 7-18 lat, którzy byli ekspozowani na różne wydarzenia traumatyczne. Zaburzenia współwystępujące mierzone były przy użyciu Anxiety Disorders Interview Schedule for DSM-IV: Child version (ADIS-C).

Wyniki: Sześć dodatkowych pozycji przy użyciu kwestionariusza CRIES-13 korelowało istotnie z zaburzeniami nastroju, natomiast pięć pozycji korelowało z zaburzeniami lękowymi.

Dodatkowe pozycje kwestionariusza demonstrowały dobrą zgodność dyskryminacyjną.

Konkluzje: Nasze wyniki wykazały użyteczność zrewidowanej wersji kwestionariusza CRIES-Plus do diagnozy PTSD i zaburzeń współwystępujących wśród dzieci.

Słowa kluczowe: PTSD; zaburzenie po stresie traumatycznym; trauma; diagnoza; badanie przesiewowe; pomiar; dziecko; adolescenci; CRIES

Name of translator: Marcin Rzeszutek, University of Finance and Management in Warsaw, Poland

**Citation:** European Journal of Psychotraumatology 2015, 6: 26661 - <http://dx.doi.org/10.3402/ejpt.v6.26661>
