# Supplementary material
Source: publisher figshare collection journal article supplement (https://tandf.figshare.com/articles/dataset/_/21829184)
Supplement: Supplementary file 2 [file 1]

## Расширенный скрининг посттравматического стрессового расстройства и коморбидного диагноза у детей и подростков

Eva Verlinden, Brent C. Opmeer, Els P. M. van Meijel, Renée Beer, Carlijn de Roos, Iva A. E. Bicanic, Francien Lamers-Winkelmann, Miranda Olff, Frits Boer, Ramón J. L. Lindauer

### Аннотация

История вопроса: Посттравматическое стрессовое расстройство (ПТСР) часто сопровождается другими психическими заболеваниями, такими как расстройства настроения, поведения и тревожные расстройства. Выявление ПТСР и психиатрической коморбидности на ранних стадиях необходимо для оказания детям и подросткам должного и своевременного лечения. Шкала Children's Revised Impact of Event Scale (CRIES-13) является надежным и валидным методом выявления ПТСР у детей. Однако эта шкала не используется в целях выявления психиатрической коморбидности у детей с вероятным диагнозом ПТСР.

Цель: Для оценки психиатрической коморбидности шкала CRIES-13 была дополнена новыми параметрами и получила название CRIES-Plus. Данное исследование было направлено на проверку точности шкалы CRIES-Plus.

Метод: В исследовании, проводимом с помощью шкалы CRIES-Plus, принимали участие 398 голландских детей (7-18 лет), переживших различные травматические события. Психиатрические диагнозы были установлены с помощью шкалы Anxiety Disorders Interview Schedule for DSM-IV: Child version (ADIS-C).

Результаты: Шесть дополнительных параметров были связаны с расстройствами настроения, три – с поведенческими расстройствами, и пять – с тревожными расстройствами. Дополнительные параметры, связанные с расстройствами настроения и тревожными расстройствами продемонстрировали значимую дискриминационную способность, с результатами  $\geq 14$  и  $\geq 10$  в выборке, соответственно. Параметры, связанные с поведенческими расстройствами показали незначительную дискриминационную способность, без значимых результатов в выборке.

Выводы: Методика CRIES-Plus может использоваться на практике для выявления ПТСР и коморбидных расстройств у детей и подростков, а также для назначения соответствующих мер диагностического и клинического ухода.

Ключевые слова: ПТСР, посттравматические стрессовые расстройства, травма, диагноз, скрининг, лечение, дети, подростки, шкала CRIES

Name of translator: Shcherbak Marina
