# Supplementary material
Source: publisher figshare collection journal article supplement (https://tandf.figshare.com/articles/dataset/_/21829184)
Supplement: Supplementary file 3 [file 1]

## **Verbesserte Untersuchungsmethoden der Posttraumatischen Belastungsstörung und komorbiden Diagnosen bei Kindern und Jugendlichen**

Eva Verlinden, Brent C. Opmeer, Els P. M. van Meijel, Renée Beer, Carlijn de Roos, Iva A. E. Bicanic, Francien Lamers-Winkelmann, Miranda Olf, Frits Boer, Ramón J. L. Lindauer

### **Abstract**

Hintergrund: Die posttraumatische Belastungsstörung (PTBS) kann für Betroffene sehr kräftezehrend sein und tritt häufig zusammen mit anderen psychiatrischen Störungen wie affektiven, Verhaltens- oder Angststörungen auf. Die Früherkennung von PTBS und psychiatrischen Begleiterkrankungen ist maßgebend, um Kindern eine angemessene und frühzeitige Behandlung bieten zu können. Die Children's Revised Impact of Event Scale (CRIES-13) ist ein reliables und valides Screeningverfahren, das die Erkennung einer PTBS bei Kindern auf Basis eines Selbstberichts ermöglicht. Hingegen ist dieses Messinstrument nicht geeignet, psychiatrische Begleiterkrankungen bei Kindern mit einer möglichen PTBS zu erkennen.

Ziel: Diese Studie untersuchte die Messgenauigkeit der CRIES-Plus, wie beispielsweise der Kombination der CRIES-13 mit zwölf zusätzlichen Items, um psychiatrische Komorbiditäten zu erkennen.

Methode: Die CRIES-Plus wurde an 398 niederländischen Kindern (7-18 Jahre) durchgeführt, welche diversen traumatischen Ereignissen ausgesetzt waren. Psychiatrische Diagnosen wurden auf Basis der Anxiety Disorders Interview Schedule for DSM-IV: Child version (ADIS-C) gestellt.

Ergebnisse: Sechs der zusätzlichen Items waren signifikant mit affektiven Störungen korreliert, drei Items konnten mit Verhaltensstörungen und fünf mit Angststörungen assoziiert werden. Zusätzliche Items, die mit affektiven und Angststörungen assoziiert wurden, zeigten ein gutes Diskriminationsvermögen mit Cut-off-Werten von  $\geq 14$  bzw.  $\geq 10$ . Items, die mit Verhaltensstörungen assoziiert wurden, wiesen ein schwaches bis mittelmäßiges Diskriminationsvermögen ohne eine klare Cut-off-Grenze auf.

Schlussfolgerungen: Unsere Erkenntnisse befürworten den Einsatz der CRIES-Plus, um PTBS und komorbide Störungen zu erkennen und Klinikpersonal die Veranlassung angemessener Folgeuntersuchungen und Versorgungsmaßnahmen zu vereinfachen.

**Keywords:** PTBS, Posttraumatische Belastungsstörung, Trauma, Diagnose, Screening, Begutachtung, Kinder, Jugendliche, CRIES

**Name of translator:** A. Kapias, B. Lueger-Schuster

**Citation:** European Journal of Psychotraumatology 2015, 6: 26661 - <http://dx.doi.org/10.3402/ejpt.v6.26661>
