# Supplementary material
Source: publisher figshare collection journal article supplement (https://tandf.figshare.com/articles/dataset/_/21829184)
Supplement: Supplementary file 4 [file 1]

## **Verbeterde screening voor posttraumatische stressstoornis en comorbide diagnoses in kinderen en adolescenten**

Eva Verlinden, Brent C. Opmeer, Els P. M. van Meijel, Renée Beer, Carlijn De Roos, Iva A. E. Bicanic, Francien Lamers-Winkelmann, Miranda Olf, Frits Boer, Ramón J. L. Lindauer

**Achtergrond:** De posttraumatische stressstoornis (PTSS) kan een slopende stoornis zijn die veelal samengaat met andere psychiatrische stoornissen, zoals stemming-, gedrags-, en angststoornissen. Vroege onderkenning van PTSS en comorbide stoornissen is van groot belang om kinderen een passende en tijdige behandeling te bieden. De Children's Revised Impact of Event Scale (CRIES-13) is een betrouwbare en valide zelfinvul vragenlijst om kinderen op PTSS te screenen. Dit meetinstrument is echter geen bruikbare screener voor psychiatrische comorbiditeit in kinderen met een vermoeden van PTSS.

**Doel:** Deze studie evalueerde de accuraatheid van screening van de CRIES-Plus, die zowel de CRIES-13 omvat als wel 12 additionele items voor het detecteren van psychiatrische comorbiditeit.

**Methode:** De CRIES-Plus werd ingevuld door 398 Nederlandse kinderen (7-18 jaar) die blootgesteld waren aan diverse traumatische gebeurtenissen. Psychiatrische diagnoses werden vastgesteld met behulp van de Anxiety Disorders Interview Schedule for DSM-IV: Child version.

**Resultaten:** Zes additionele items bleken significant geassocieerd met stemmingsstoornissen, drie items werden geassocieerd met gedragsstoornissen, en vijf items met angststoornissen. Additionele items die geassocieerd werden met stemmings- en angststoornissen toonden goede discriminerende validiteit met, respectievelijk, afkapscores van  $\geq 14$  and  $\geq 10$ . Items die geassocieerd werden met gedragsstoornissen hadden een zwakke tot matige discriminerende validiteit, zonder duidelijk afkappunt.

**Conclusies:** De bevindingen ondersteunen het gebruik van de CRIES-Plus bij de screening van PTSS en comorbide stoornissen, welke klinici kunnen helpen in de juiste vervolkeuze voor diagnostiek en klinische zorg.
