# Supplementary material
Source: publisher figshare collection journal article supplement (https://tandf.figshare.com/articles/dataset/_/21829184)
Supplement: Supplementary file 5 [file 1]

---

**Title:** 加强儿童和青少年创伤后应激障碍和共病诊断的筛查 s

Eva Verlinden, Brent C. Opmeer, Els P. M. van Meijel, Renée Beer, Carlijn de Roos, Iva A. E. Bicanic, Francien Lamers-Winkelmann, Miranda Olff, Frits Boer, Ramón J. L. Lindauer

**Abstract**

背景：创伤后应激障碍（PTSD）可能是一种令人衰弱的障碍，并且常常共患其他精神障碍，比如心境障碍、行为障碍、焦虑障碍。早期识别 PTSD 和共患精神疾病与提供给儿童适当且及时的治疗高度相关。修订版儿童事件影响量表 (CRIES-13) 是一种可信且有效的筛查儿童 PTSD 的自评测量工具。但是，这种测量工具不能用于在可能患有 PTSD 的儿童筛查共患精神疾病。

目的：这项研究评估了 CRIES-Plus 筛查的准确性，例如 CRIES-13 合并 12 个附加条目用于检测共患精神疾病。

方法：398 名暴露于各种创伤事件的荷兰儿童 (7-18 岁) 完成了 CRIES-Plus 量表。精神障碍诊断评价采用儿童版 DSM-IV 焦虑障碍访谈表 (ADIS-C)。

结果：6 个附加条目与心境障碍显著相关，3 个条目与行为障碍有关，5 个条目与焦虑障碍有关。另外，与心境障碍和焦虑障碍相关的条目在划界分  $\geq 14$  和  $\geq 10$  时，都显示了较好的区分能力。与行为相关障碍显示出差到一般的区分能力，没有明确的划界分。

结论：我们的研究支持 CRIES-Plus 应用在 PTSD 和共病障碍的筛查，可能帮助临床医生后续进行适当的诊断和临床治疗。

**Keywords:** PTSD, 创伤后应激障碍, 创伤, 诊断, 筛查, 评价, 儿童, 青少年, CRIES

Name of translator: Xiwen Hu

**Citation:** European Journal of Psychotraumatology 2015, 6: 26661 - <http://dx.doi.org/10.3402/ejpt.v6.26661>
