# Supplementary material
Source: publisher figshare collection journal article supplement (https://tandf.figshare.com/articles/dataset/_/21829184)
Supplement: Supplementary file 6 [file 1]

## **Çocuklarda ve Ergenlerde Travma sonrası Stres Bozukluğu ve Eş zamanlı Tanılar için Geliştirilmiş Tarama**

Eva Verlinden, Brent C. Opmeer, Els P. M. van Meijel, Renée Beer, Carlijn de Roos, Iva A. E. Bicanic, Francien Lamers-Winkelmann, Miranda Olff, Frits Boer, Ramón J. L. Lindauer

### **Abstract**

Arkaplan: Travma Sonrası Stres Bozukluğu (TSSB) güçten düşüren bir rahatsızlık olabilmektedir ve bazen duygudurum-, davranışsal-, ve kaygı bozuklukları gibi diğer psikiyatrik rahatsızlıklarla birlikte görülebilir. TSSB için erken tanımlama ve psikiyatrik eş zamanlı hastalıklar çocuklara uygun ve zamanlı tedavi önermek için oldukça alakalıdır. The Children's Revised Impact of Event Scale (CRIES-13) güvenilir ve geçerli kişinin kendi yanıtladığı bir ölçektir ve çocuklardaki TSSB taramak için kullanılmaktadır. Buna rağmen , bu ölçek olası TSSBli çocuklardaki psikiyatrik eş zamanlı hastalıkları taramak için kullanışlı değildir. Amaç: Bu çalışma CRIES-Plus ölçeğinin tarama doğruluğunu değerlendirmektedir , örn., CRIES-13 psikiyatrik eş zamanlı hastalığı saptamak için 12 ek madde ile birleştirilmiştir. Yöntem: CRIES-Plus çeşitli travmalara maruz kalan 398 Hollandalı çocuk (7-18 yaş arası) tarafından doldurulmuştur. DSM-IV için Psikiyatrik tanılar Anksiyete Bozukluğu Görüşme Formu: Çocuk Versiyonu (ADIS-C). Sonuçlar: altı ek maddeler belirgin şekilde duygudurum bozuklukları ile ilgiliydi, üç madde davranış bozukluğuyla ilgili, ve beş madde kaygı bozuklukları ile ilgiliydi. Duygudurum-, kaygı bozuklukları ile ilgili ek maddeler  $\geq 14$   $\geq 10$  kesme puanları ile iyi ayrıcı özellikler göstermişlerdir. Davranış bozuklukları ile ilgili maddeler kesin bir kesme puanı olmaksızın zayıf tan yeterliye doğru ayırıcı özelliklere sahiptiler. Sonuçlar: Bulgular klinisyenlerin uygun takip tanı ve klinik bakım için yardımcı olabilecek PTSD ve eş zamanlı hastalık taraması için CRIES-Plus kullanımını desteklemiştir.

Anahtar Kelimeler: TSSB, travma sonrası stres bozukluğu, travma, tanı, tarama, değerlendirme, çocuk, ergen, CRIES

Name of translator: Seray Akça

**Citation:** European Journal of Psychotraumatology 2015, 6: 26661 - <http://dx.doi.org/10.3402/ejpt.v6.26661>
